# Supplementary material for: TGF-β Type I Receptor Signaling in Melanoma Liver Metastases Increases Metastatic Outgrowth
Source: MDPI journal article supplement (doi:10.3390/ijms24108676), 2023-05-12
Supplement: s1 [file s1]

**Supplementary Table S1, cloning primers**

| Primer                     | Use         | Sequence (5' – 3')                 |
|----------------------------|-------------|------------------------------------|
| <i>hALK5 FW bmtI</i>       | PCR         | TAAGTAGCTAGCTGCAGATGGAGGCGGGG      |
| <i>hALK5 FLAG-age1 REV</i> | PCR         | TGTTAACGACCGGTGAGCGCTG             |
| <i>hALK5 FW</i>            | PCR         | CGGATCCTTAGTGGTGG                  |
| <i>hALK5 REV</i>           | PCR         | ATTCAGTCGACTGATGGAGGCGGCGGTCGCT    |
| <i>kiALK5 K232R</i>        | Mutagenesis | GAAGAAGTTGCTGTTAGGATATTCTCCTCTAGAG |
| <i>hALK5 FW seq</i>        | Sequencing  | CAACCGCACTGTCATTACCATC             |
| <i>hALK5 REV seq</i>       | Sequencing  | TTCTTCTCCCCGCCACTTTCCTCT           |

**Supplementary Table S2, rt-qPCR primers**

| Gene             | Forward (5' – 3')      | Reverse (5' -3')         |
|------------------|------------------------|--------------------------|
| <i>hALK5</i>     | CAACCGCACTGTCATTACCATC | TTCTTCTCCCCGCCACTTTCCTCT |
| <i>mAlk5</i>     | ATTCCTCGAGACAGGCCATT   | CAGCTGACTGCTTTTCTGTAGT   |
| <i>Serpine-1</i> | GCCAACAAGAGCCAATCACA   | AGGCAAGCAAGGGCTGAAG      |
| <i>Ctgf</i>      | GGCCTCTTCTGCGATTTG     | CCATCTTTGGCAGTGCACT      |
| <i>Smad7</i>     | TGGATGGCGTGTGGGTTTA    | TGGCGGACTTGATGAAGATG     |
| <i>Gapdh</i>     | CCAAGTCGGATGTGGAAATGG  | TGTCGCAAGTGGACAGTCTC     |
| <i>Hprt</i>      | TGGATACAGGCCAGACTTTGTT | CAGATTCAACTTGCCTCATC     |
