# Supplementary figures and images for: TGF-β Type I Receptor Signaling in Melanoma Liver Metastases Increases Metastatic Outgrowth
Source: MDPI journal article supplement (doi:10.3390/ijms24108676), 2023-05-12

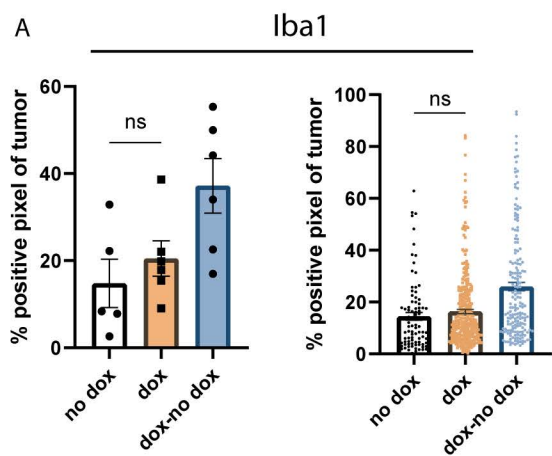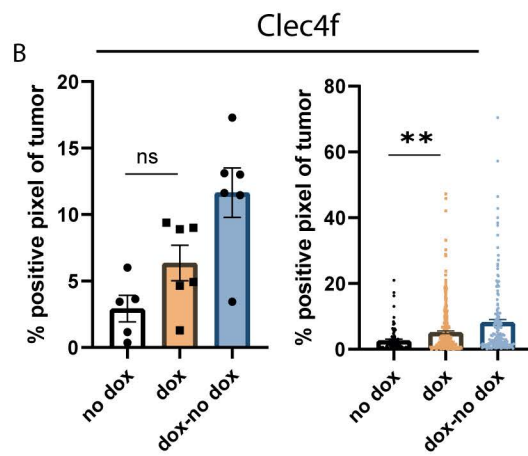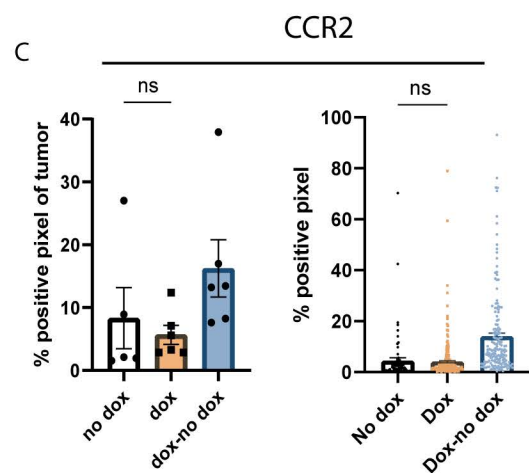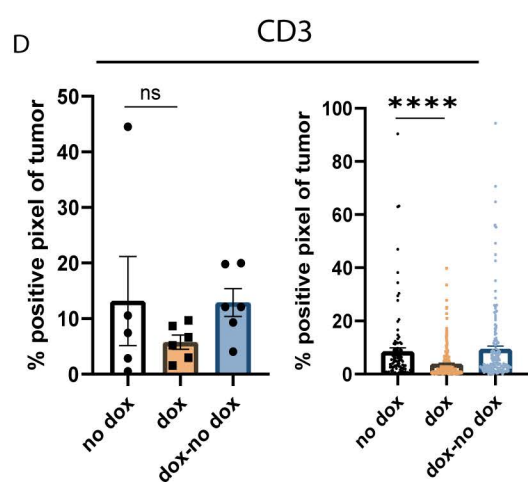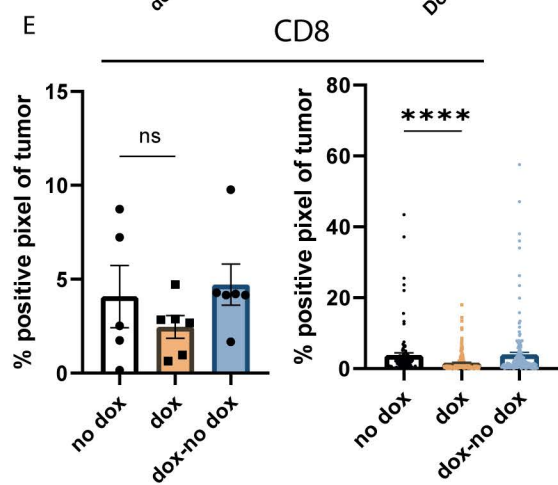

Supplement: s1 [file s1]

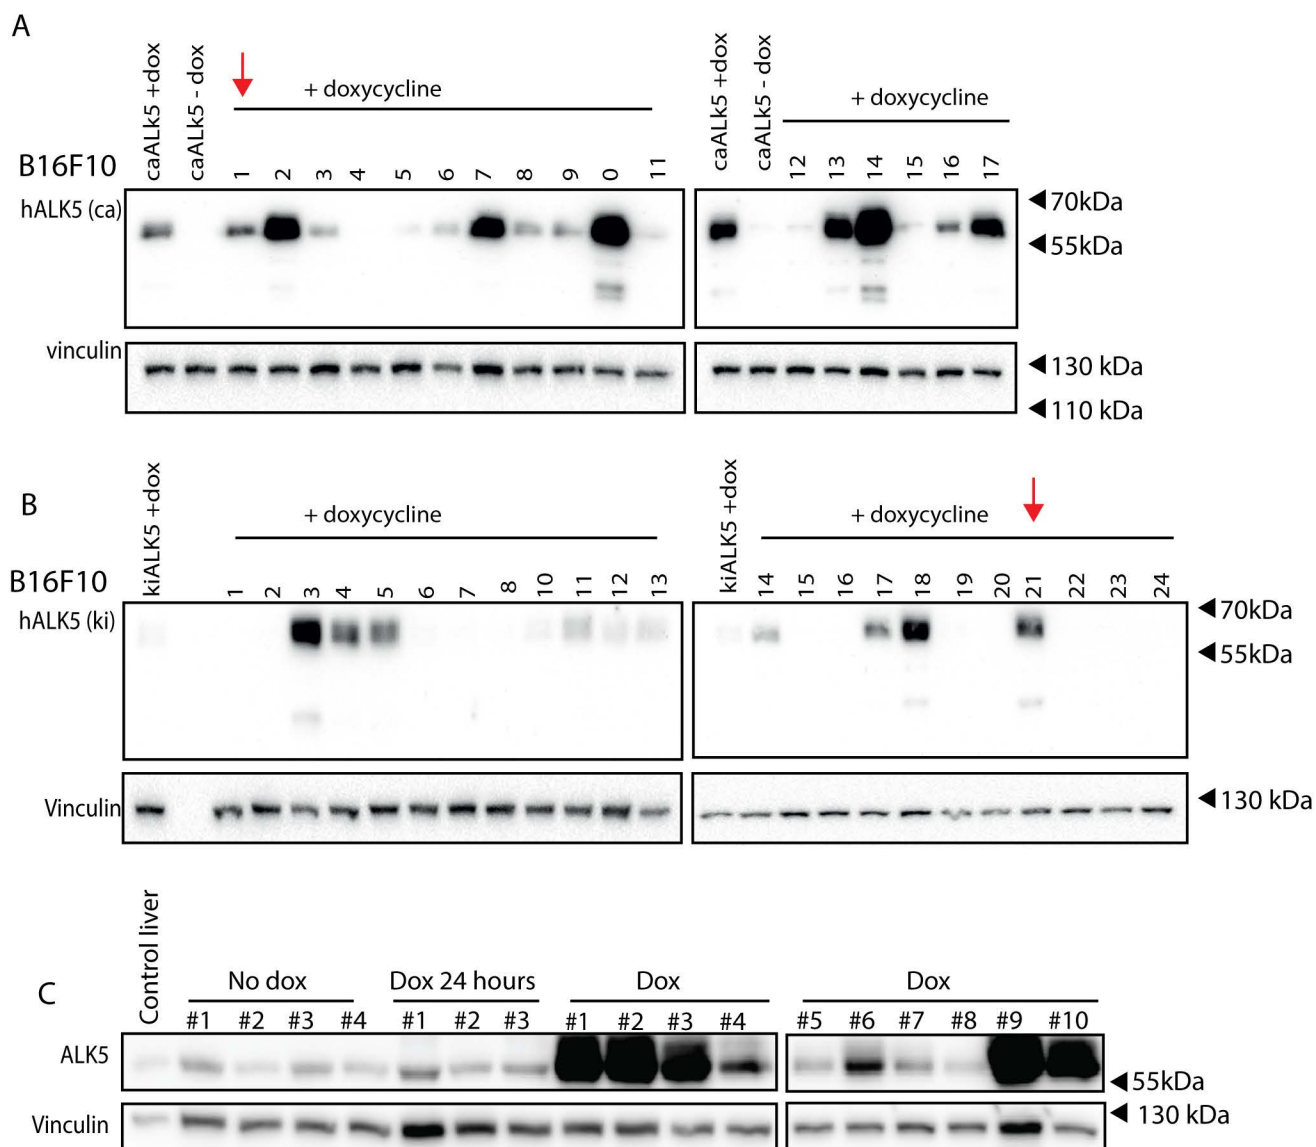

Supplement: s1 [file s1]

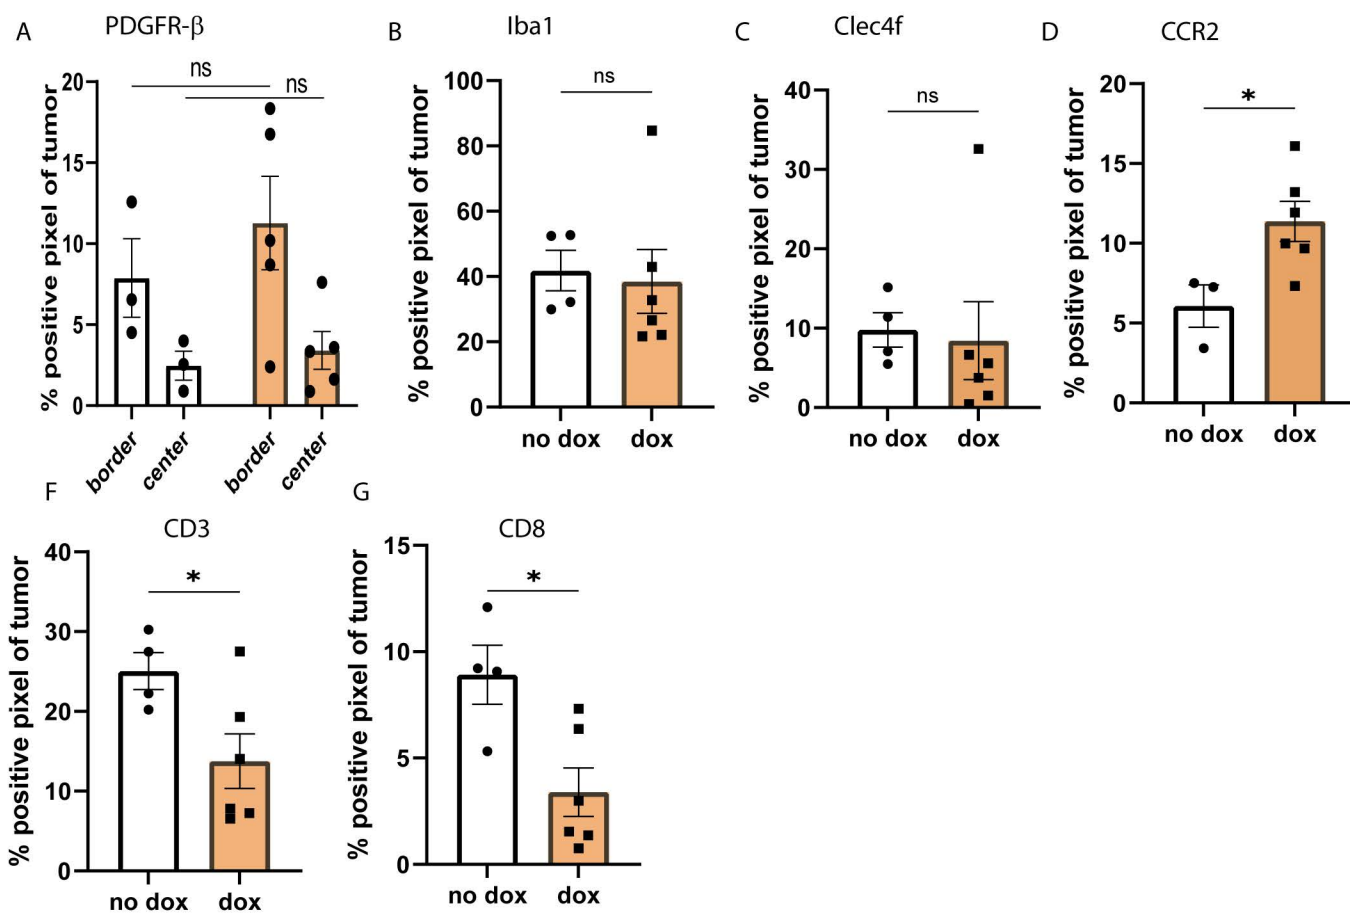

Supplement: s1 [file s1]

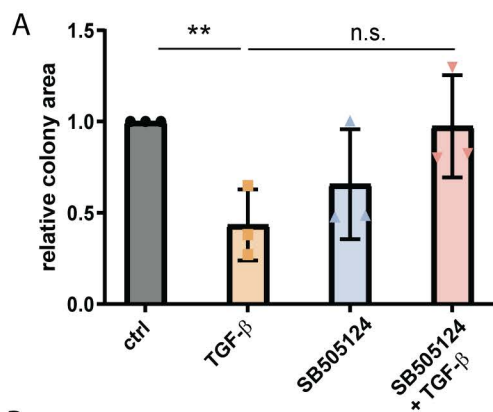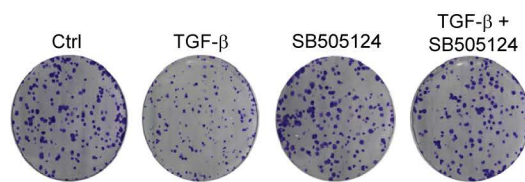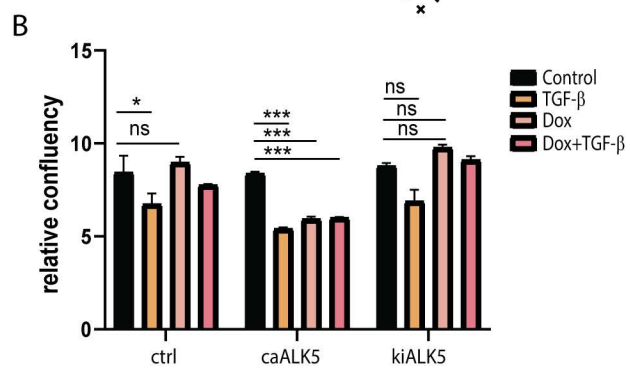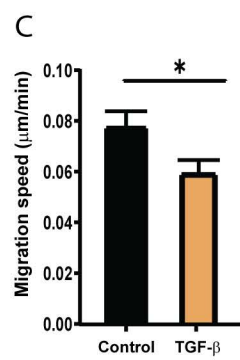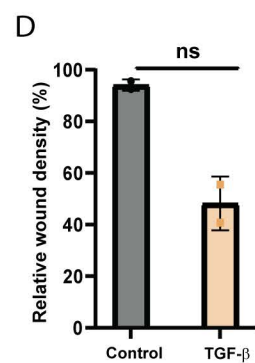

Supplement: s1 [file s1]

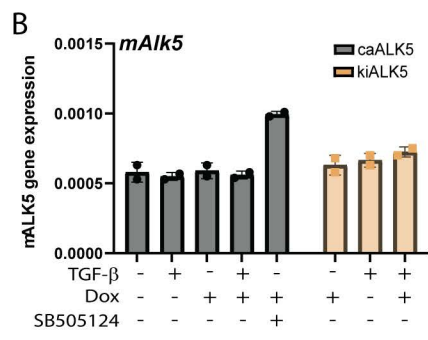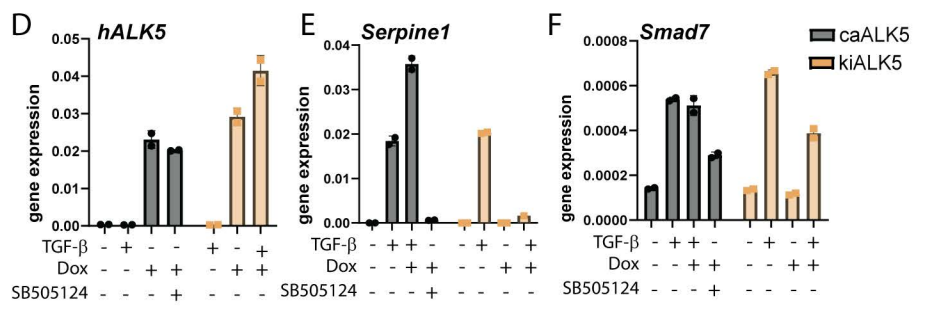

Supplement: s1 [file s1]
